# Supplementary material for: Rickettsiae in Ticks, Japan, 2007–2011
Source: PubMed Central journal article supplement (PMC3559048; doi:10.3201/eid1902.120856), 2013-02
Supplement: 12-0856-Techapp-s1.pdf [file 12-0856-Techapp-s1.pdf]

# Rickettsiae in Ticks, Japan, 2007–2011

## Technical Appendix

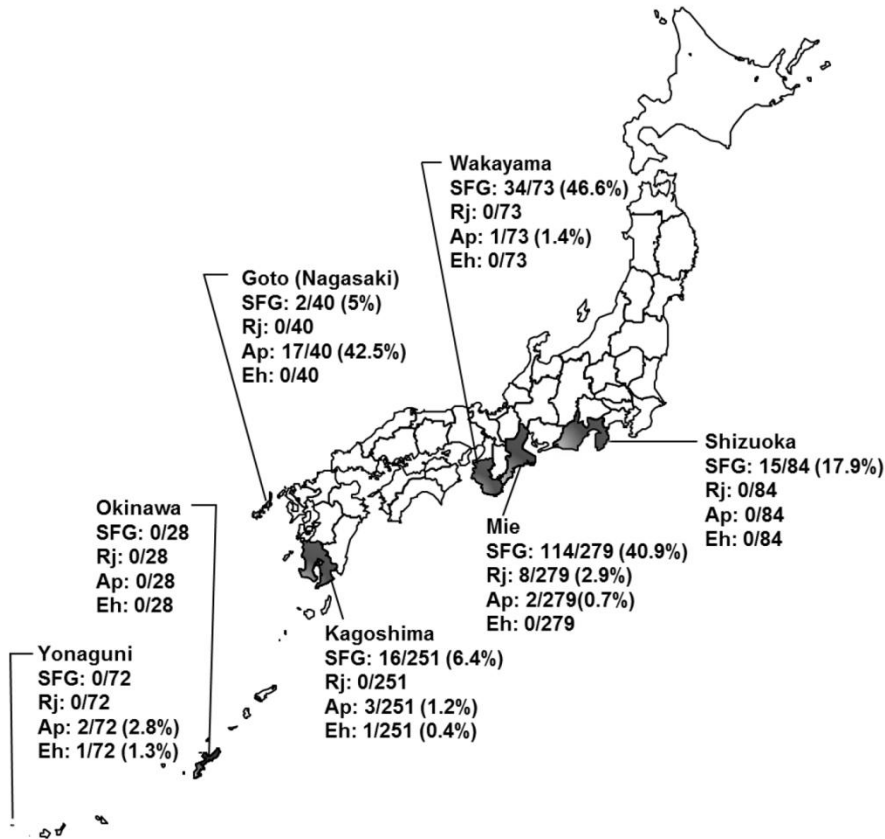

Figure 1. Prefectures where ticks were collected for a study of *Rickettsia* spp.–related pathogens in ticks in central and western Japan, 2007–2011. SFG, spotted fever group rickettsiae; Rj, *R. japonica*; Ap, *A. phagocytophilum*; Eh, *Ehrlichia* spp. Numbers indicate the number of positive ticks/number of ticks tested.

The prevalence of respective *Rickettsiales* bacteria in each area is shown in parentheses.

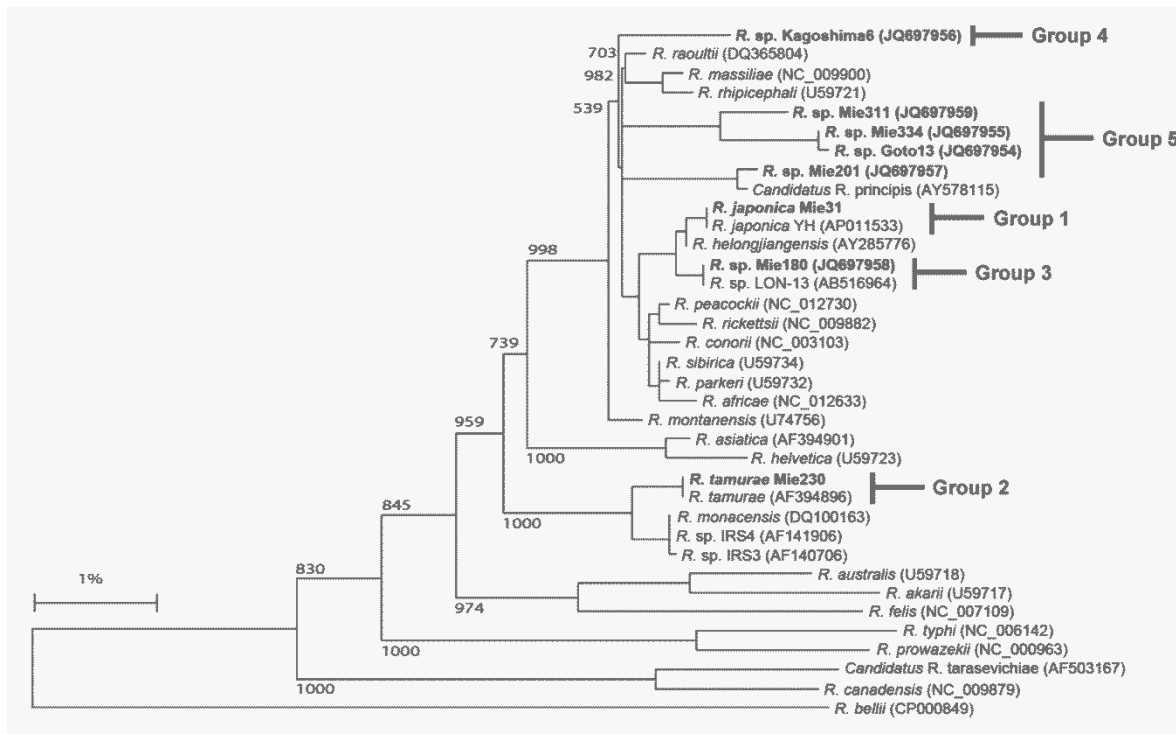

Figure 2. Phylogenetic classification of *Rickettsia* spp. *gltA* sequences detected in ticks inhabiting central and western Japan, 2007–2011. The tree, based on the *gltA* sequences (1,115–1,123 bp), was constructed by using the neighbor-joining method with 1,000 bootstrap resamplings. **Boldface** font indicates *Rickettsia* spp. identified in this study. Numbers in parentheses indicate GenBank accession numbers for the respective sequences. The scale bar indicates nucleotide substitutions per site.
